# Supplementary material for: White light generation using Förster resonance energy transfer between 3-hydroxyisoquinoline and Nile Red
Source: Royal Society of Chemistry journal article supplement (doi:10.1039/c6pp00005c), 2016-02-25
Supplement: c6pp00005c1.pdf [file c6pp00005c1.pdf]

**ELECTRONIC SUPPORTING INFORMATION**

**for**

**White Light Generation using Förster Resonance Energy Transfer between 3-  
Hydroxyisoquinoline and Nile Red**

**\*Corresponding Authors E-mail:** [matthew.paige@usask.ca](mailto:matthew.paige@usask.ca) (MFP); [ron.steer@usask.ca](mailto:ron.steer@usask.ca) (RPS).

**Table S1: Decay parameters of HIQ-NR in PVA at  $\lambda_{ex} = 450$  nm.  $[HIQ] = 10^{-4}$  M**

| [NR]<br>M | $\lambda_{em}$<br>(nm) | $\tau_1$<br>(ns)     | $\tau_2$<br>(ns)      | $\alpha_1$<br>(%) | $\alpha_2$<br>(%) |
|-----------|------------------------|----------------------|-----------------------|-------------------|-------------------|
| 0         | 540                    | 4.2<br>( $\pm 0.2$ ) | 15.3<br>( $\pm 0.2$ ) | 4                 | 96                |
| $10^{-6}$ | 540                    | 3.4<br>( $\pm 0.1$ ) | 15.1<br>( $\pm 0.2$ ) | 3                 | 97                |

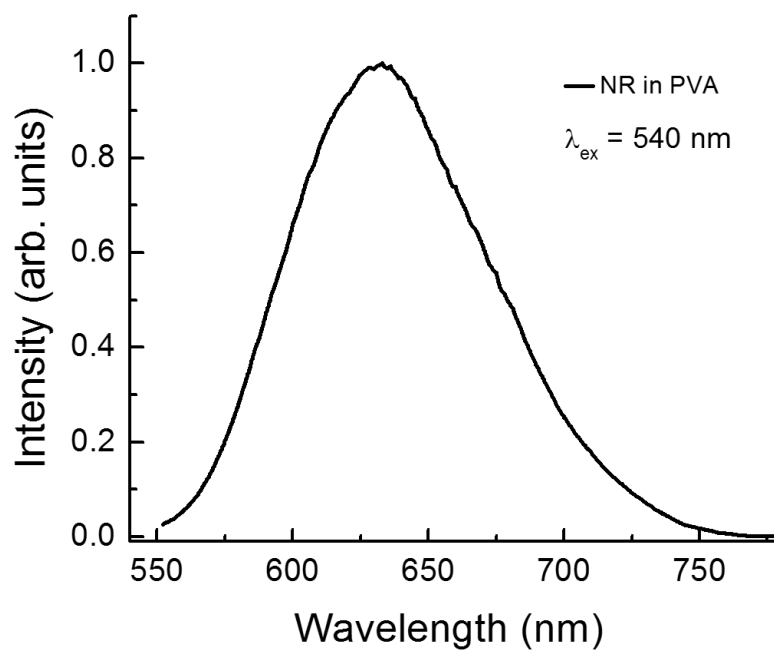

**Figure S1: Emission spectrum of NR ( $10^{-5}$  M) in PVA film at  $\lambda_{ex} = 540$  nm.**

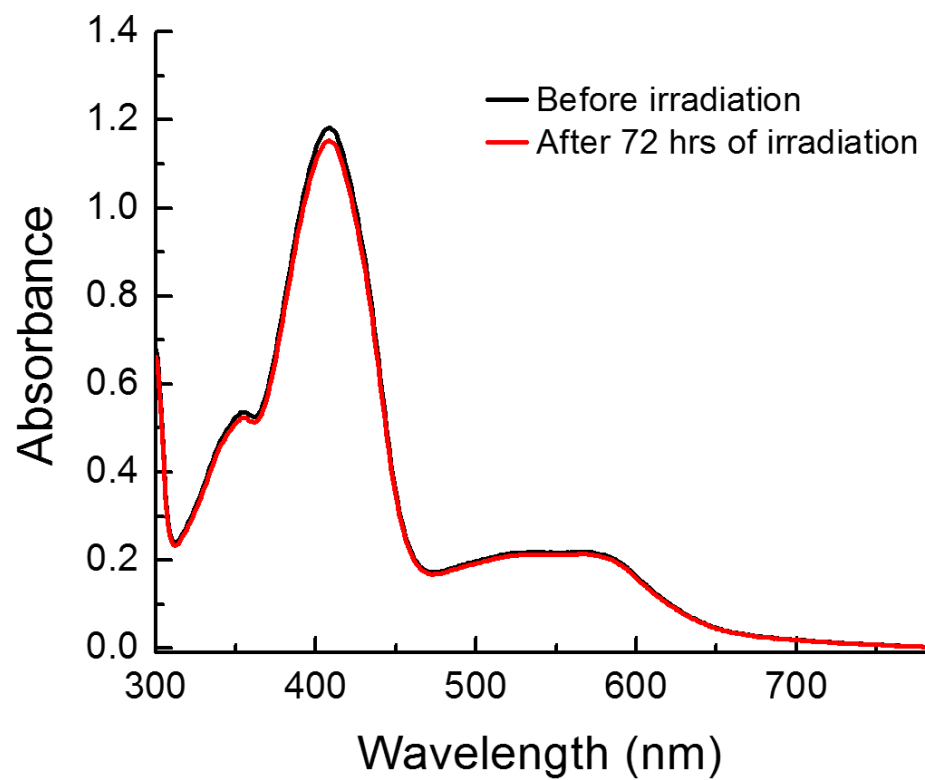

**Figure S2:** Absorption spectra of HIQ (10<sup>-4</sup> M)-NR (10<sup>-5</sup> M) in PVA film before and after 72 hrs of illumination with diffuse 405 nm light.
